# Supplementary material for: Individual differences in regulatory mode moderate the effectiveness of a pilot mHealth trial for diabetes management among older veterans
Source: PubMed Central journal article supplement (PMC5841664; doi:10.1371/journal.pone.0192807), 2018-03-07
Supplement: pone.0192807.s003.pdf [file pone.0192807.s003.pdf]

**Fig A.**  
Individual weekly adherence patterns by domain.

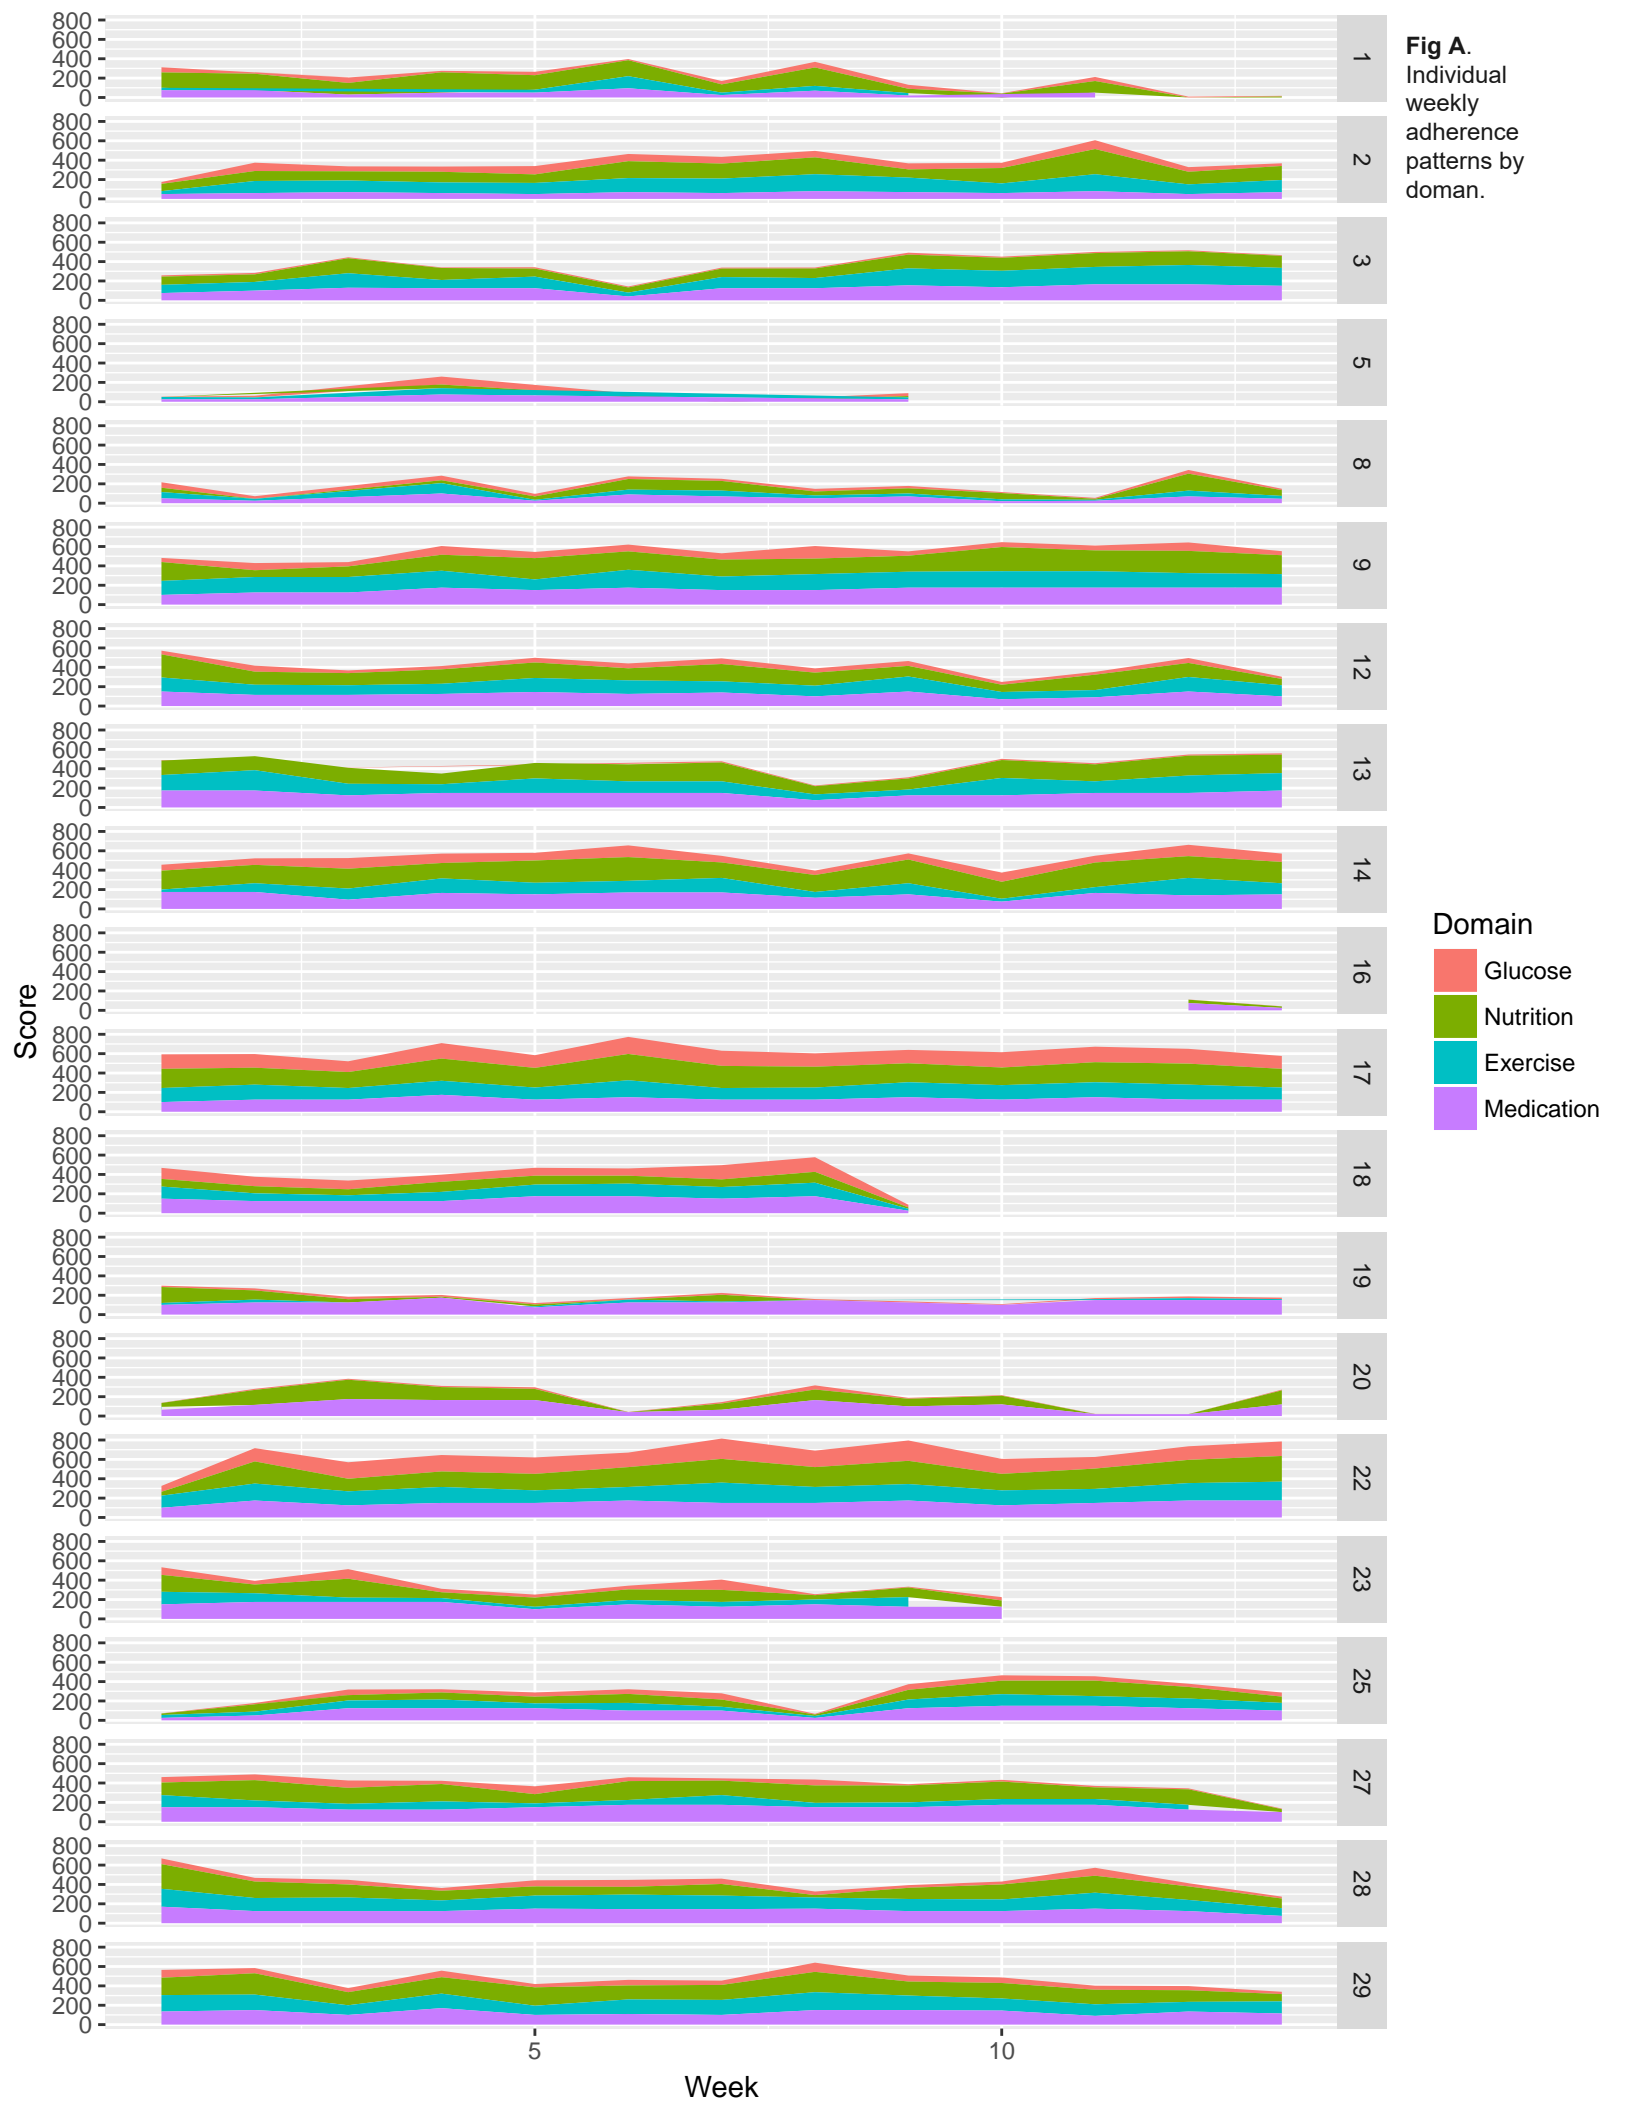

**Table A.** Summary of HbA1C Collection Information

| ID | <u>Baseline Measure</u> |                 | <u>Post Measure</u> |                 |
|----|-------------------------|-----------------|---------------------|-----------------|
|    | Value (%)               | Date from Start | Value (%)           | Date from Start |
| 1  | 9.2                     | -2              | 7.7                 | +74             |
| 2  | 8.1                     | -2              | 7.9                 | +97             |
| 3  | 9.9                     | -72             | 8.7                 | +26             |
| 5  | 7.9                     | +20             | 8.1                 | +62             |
| 8  | 8.5                     | +6              | 8.2                 | +91             |
| 9  | 8.7                     | -64             | 6.9                 | +91             |
| 11 | 9.4                     | -63             | 14.0                | +104            |
| 12 | 9.4                     | +19             | 8.2                 | +105            |
| 13 | 10.4                    | -97             | 8.5                 | +62             |
| 14 | 7.7                     | +6              | 7.3                 | +82             |
| 15 | 11.6                    | -57             | 13.0                | +111            |
| 16 | 8.0                     | -56             | 9.6                 | +72             |
| 17 | 8.4                     | -57             | 7.3                 | +34             |
| 18 | 9.0                     | -57             | 8.4                 | +83             |
| 19 | 9.1                     | -127            | 9.1                 | +104            |
| 20 | 8.8                     | -50             | 9.6                 | +103            |
| 22 | 9.3                     | -26             | 8.2                 | +62             |
| 23 | 7.6                     | -15             | 8.1                 | +91             |
| 25 | 7.6                     | -14             | 7.8                 | +105            |
| 27 | 8.8                     | -9              | 8.4                 | +71             |
| 28 | 8.8                     | -44             | 9.0                 | +55             |
| 29 | 10.7                    | -19             | 9.3                 | +89             |

Negative values indicate that the measure was taken the stated number of days *before* the start of the study. Positive values indicate that the measure was taken *after* the start of the study. Baseline HbA1C measures taken on or before the start of the study period would have values  $\leq 0$ . Post-study HbA1C measures assessed on the last day of or after the study would have values  $\geq +91$ .

**Table B.** Allocation of Points for Healthy Behavior

| Behavior                                                        | Value            |
|-----------------------------------------------------------------|------------------|
| <i>Glucose Maximum Daily Total</i>                              | <i>30 points</i> |
| Report glucose twice                                            | 5 points         |
| Report glucose three times                                      | 7 points         |
| Report glucose four times                                       | 10 points        |
| Maintain glucose within target range for half of the recordings | 10 points        |
| Maintain glucose within target range for all recordings         | 20 points        |
| <br>                                                            |                  |
| <i>Nutrition Maximum Daily Total</i>                            | <i>45 points</i> |
| Report 2 meals or snacks                                        | 10 points        |
| Report 3 meals or snacks                                        | 15 points        |
| Report 4 meals or snacks                                        | 4 points         |
| Report 5 meals or snacks                                        | 5 points         |
| Report 6 meals or snacks                                        | 6 points         |
| Keep carbs at or below consumption goal                         | 20 points        |
| Eat 3 servings of fruits or vegetables                          | 10 points        |
| <br>                                                            |                  |
| <i>Exercise Maximum Daily Total</i>                             | <i>35 points</i> |
| Report exercise or sync with Fitbit                             | 5 points         |
| Engage in 15 minutes of exercise                                | 20 points        |
| Engage in 30 minutes of exercise                                | 25 points        |
| Engage in 45 minutes or more of exercise                        | 30 points        |
| <br>                                                            |                  |
| <i>Medication Maximum Daily Total</i>                           | <i>30 points</i> |
| Reported medication information                                 | 10 points        |
| Took all recommended medications that day                       | 20 points        |
| Took some, but not all recommended medications that day         | 10 points        |

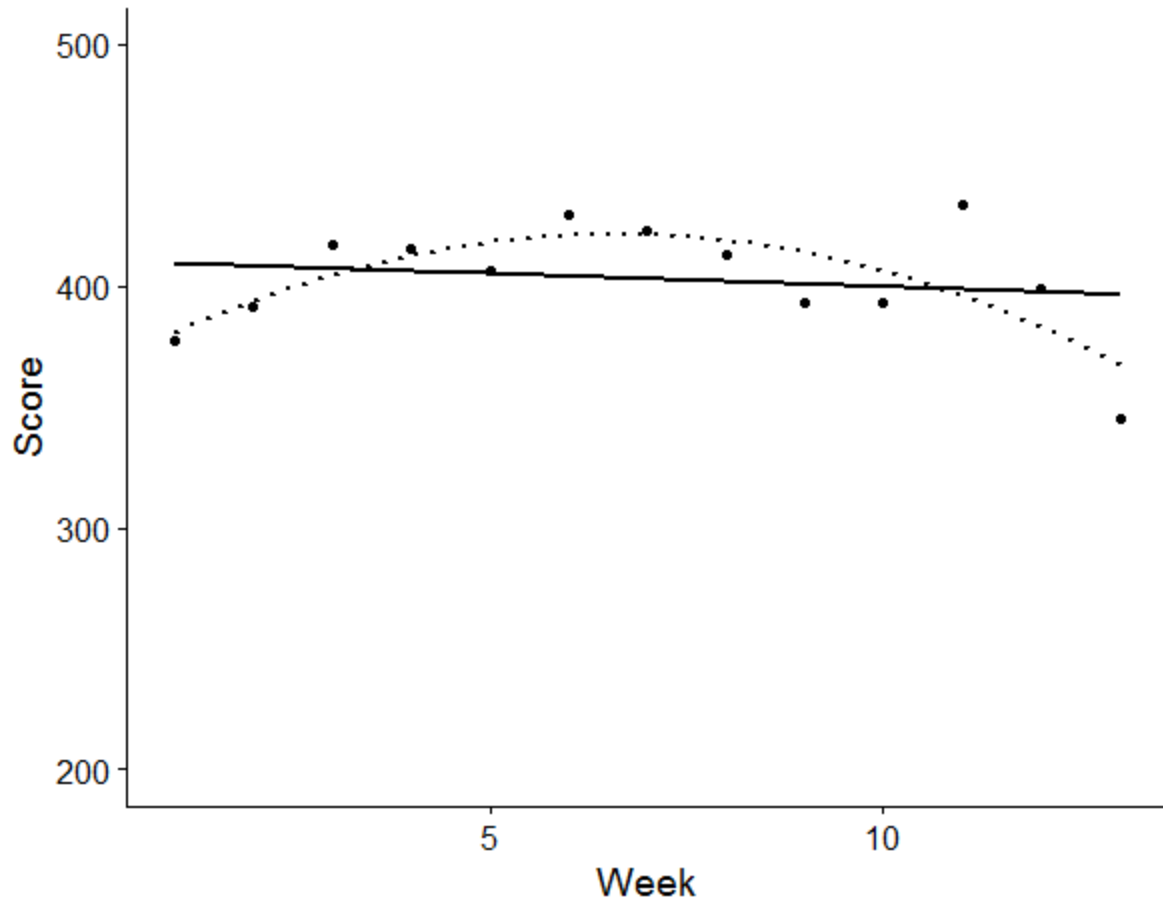

**Fig B.** Depicts mean levels of weekly adherence with superimposed linear and quadratic trends.

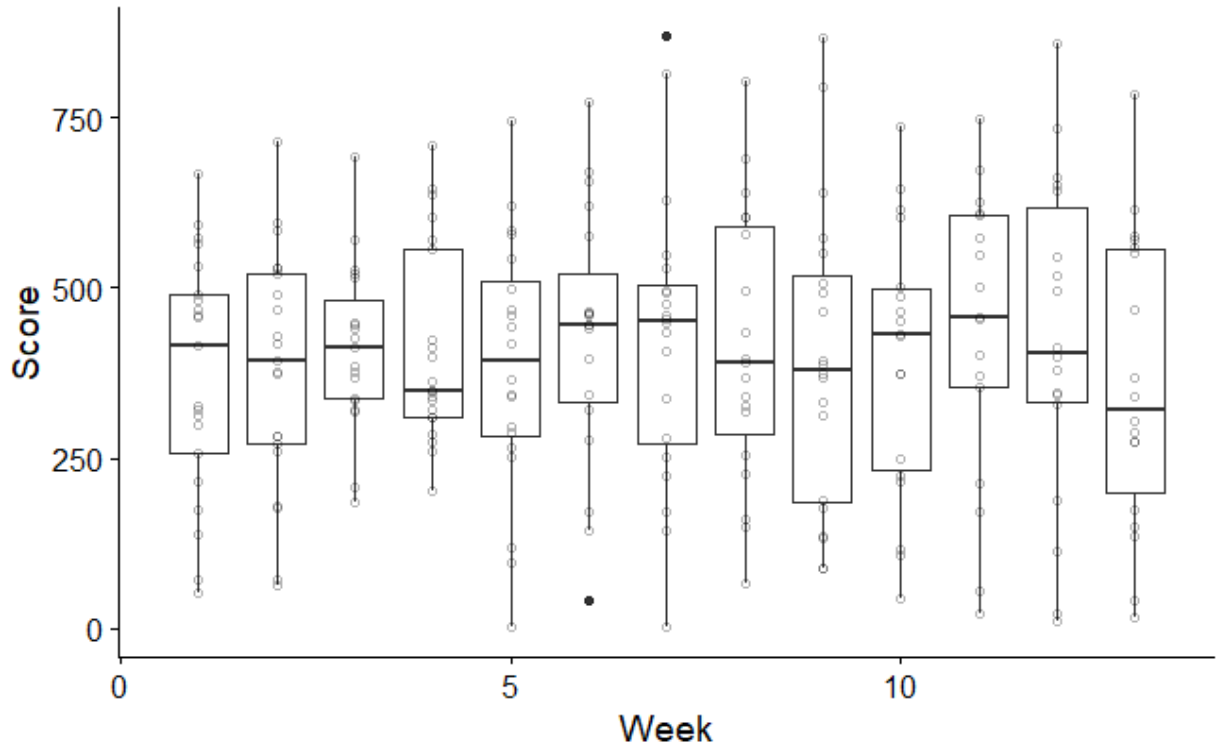

**Fig C.** Depicts boxplot of weekly adherence scores.

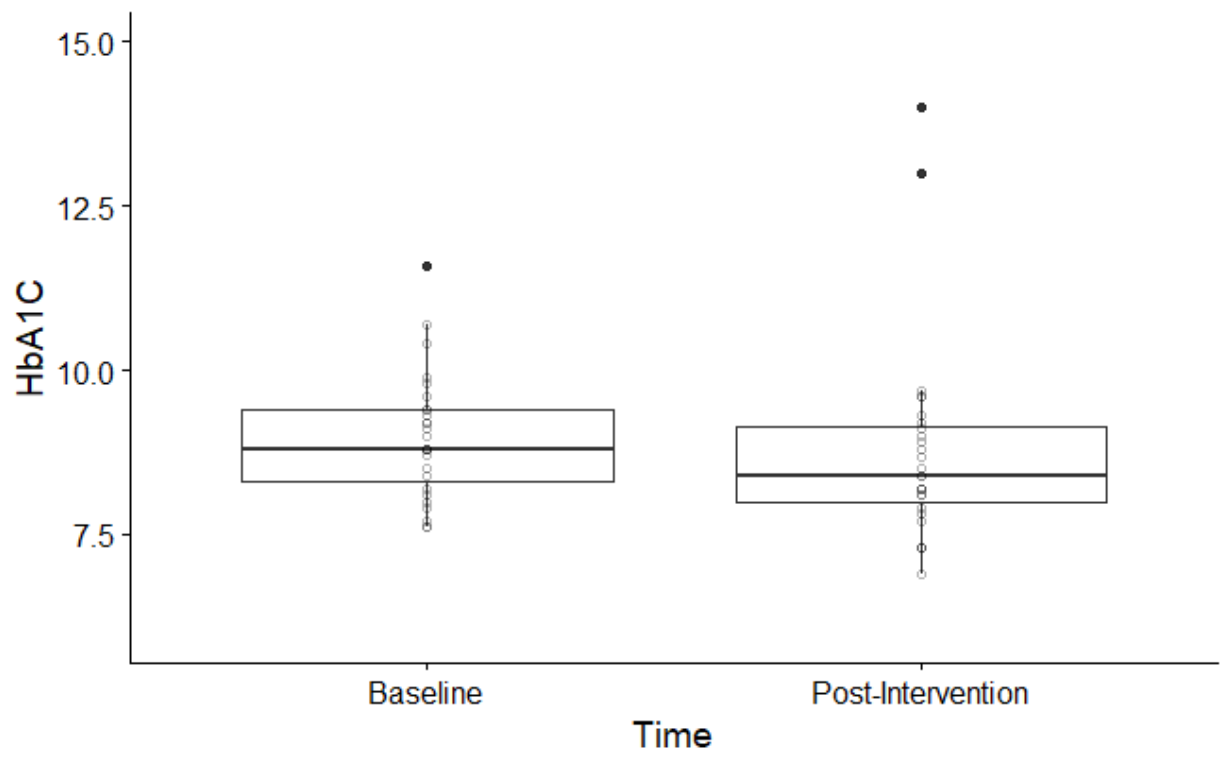

**Fig D.** Depicts boxplot of HbA1C values by time.

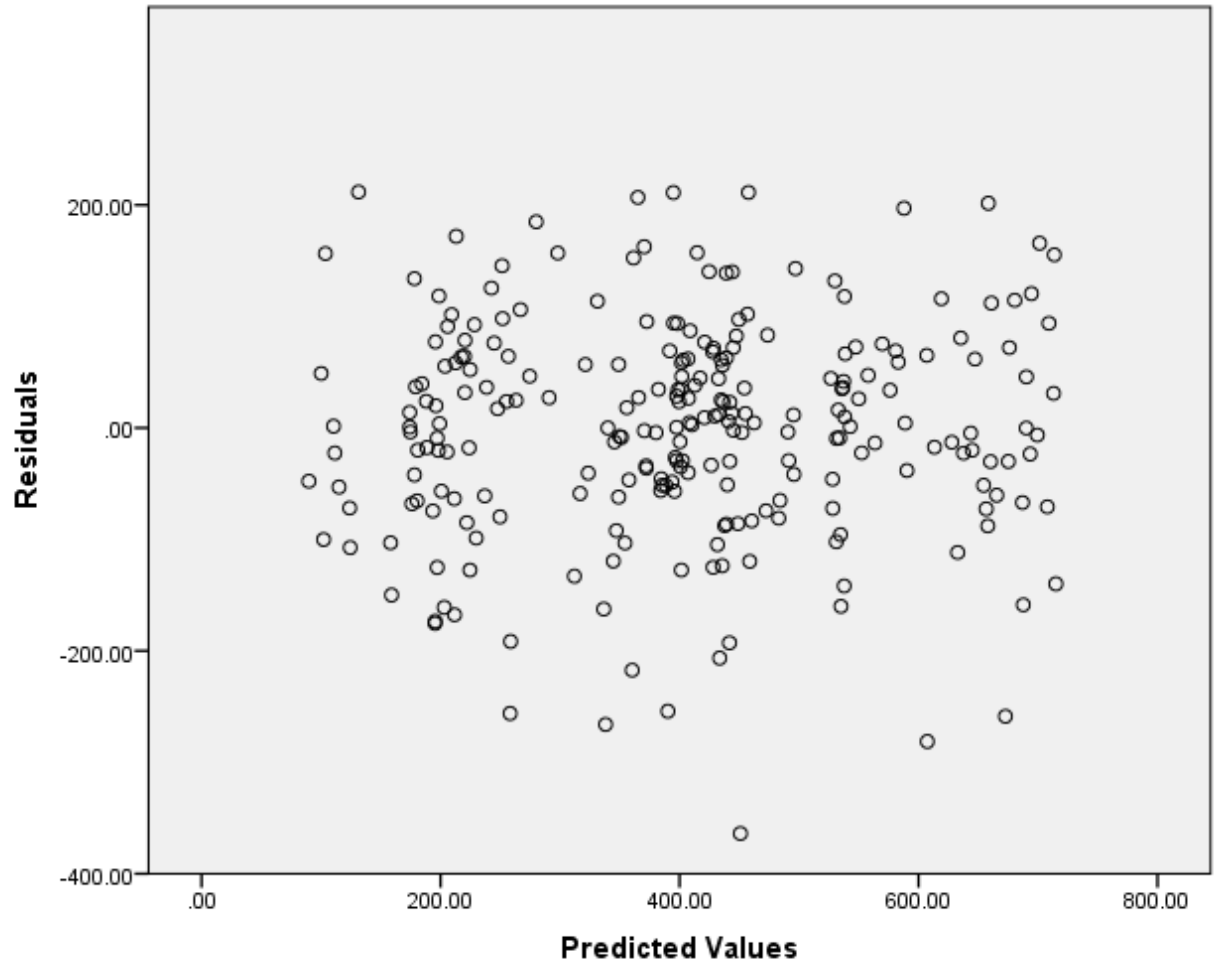

**Fig E.** Depicts diagnostics of the mixed effects model examining trends in weekly adherence.

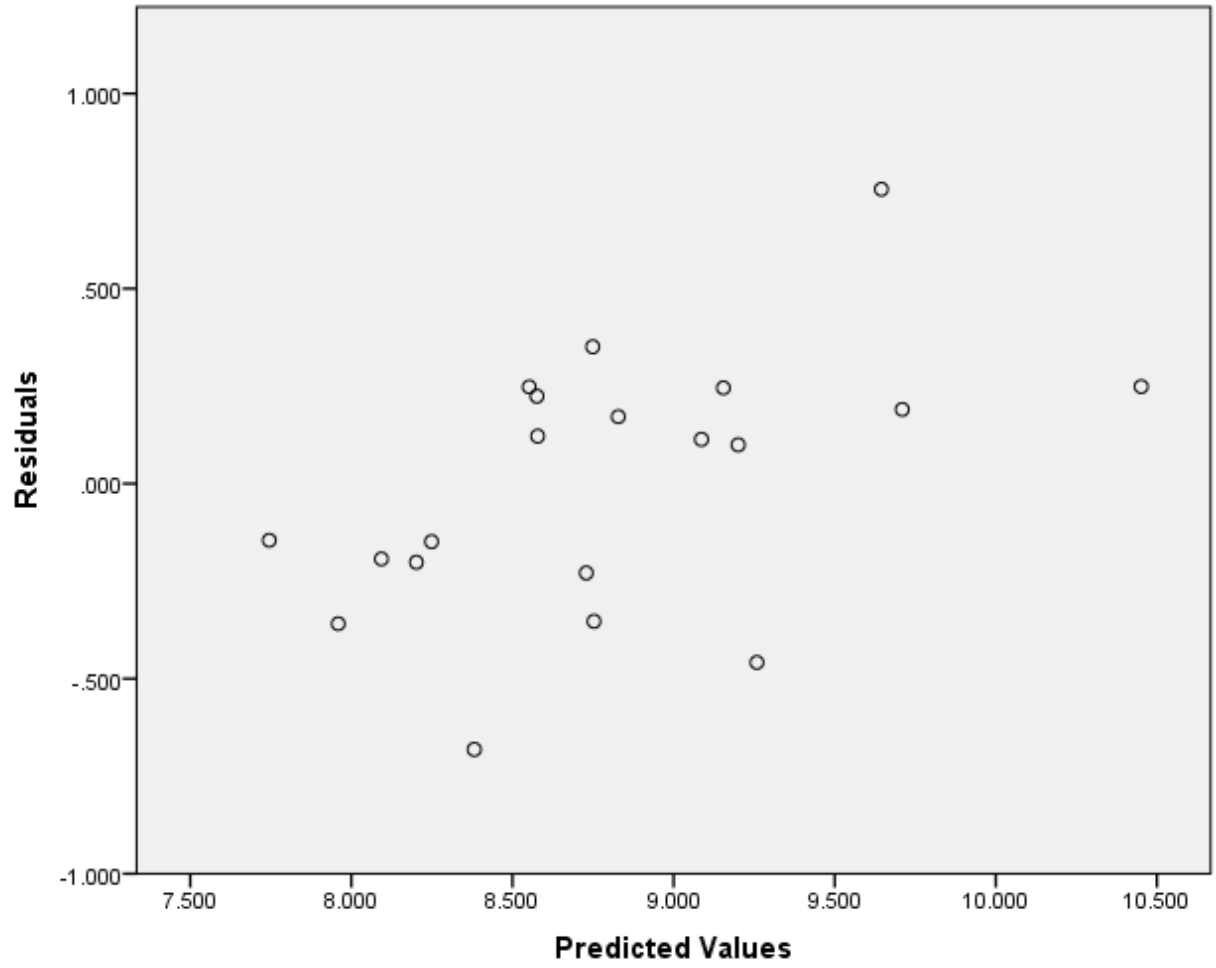

**Fig F.** Depicts diagnostics of the mixed effects model examining changes in HbA1C.
