# Supplementary material for: Individual differences in regulatory mode moderate the effectiveness of a pilot mHealth trial for diabetes management among older veterans
Source: PubMed Central journal article supplement (PMC5841664; doi:10.1371/journal.pone.0192807), 2018-03-07
Supplement: pone.0192807.s005.pdf [file pone.0192807.s005.pdf]

**Table A. Model Estimates Predicting HbA1C Including Outliers (N = 22)**

|                       | Est.  | SE   | <i>t</i> | <i>p</i> |
|-----------------------|-------|------|----------|----------|
| <i>Fixed Effects</i>  |       |      |          |          |
| Intercept             | 8.98  | 0.28 | 32.38    | < .001   |
| Age                   | -.06  | 0.04 | -1.33    | .20      |
| T2                    | 0.48  | 0.46 | 1.04     | .31      |
| T3                    | -0.57 | 0.41 | -1.39    | .18      |
| T4                    | -0.64 | 0.41 | -1.57    | .14      |
| Time                  | -0.27 | 0.28 | -0.59    | .56      |
| Adherence             | 0.41  | 0.28 | 1.46     | .16      |
| Time x Adherence      | -0.65 | 0.28 | -2.32    | .03      |
| <i>Random Effects</i> |       |      |          |          |
| $\sigma^2$            | .85   | .27  |          | < .01    |
| $\tau_{00}$           | .82   | .46  |          | .07      |

$\sigma^2$  = residual,  $\tau_{00}$  = variance in intercept by participant. *Note.* The same multilevel regression models explaining changes in HbA1C levels were tested with different exclusion criteria for the analyses, with the results excluding only outliers reported in the main text.

**Table B. Model Estimates Predicting HbA1C Excluding Early HbA1C Measures (N = 17)**

|                       | Est.  | SE   | <i>t</i> | <i>p</i> |
|-----------------------|-------|------|----------|----------|
| <i>Fixed Effects</i>  |       |      |          |          |
| Intercept             | 8.96  | 0.37 | 24.20    | < .001   |
| Age                   | -0.07 | 0.05 | -1.26    | .23      |
| T2                    | 0.73  | 0.69 | 1.07     | .31      |
| T3                    | -0.59 | 0.51 | -1.16    | .27      |
| T4                    | -0.84 | 0.67 | -1.26    | .24      |
| Time                  | -0.08 | 0.35 | -0.22    | .83      |
| Adherence             | 0.62  | 0.40 | 1.57     | .14      |
| Time x Adherence      | -0.76 | 0.37 | -2.08    | .06      |
| <i>Random Effects</i> |       |      |          |          |
| $\sigma^2$            | 1.06  | .39  |          | < .01    |
| $\tau_{00}$           | 1.09  | .72  |          | .13      |

$\sigma^2$  = residual,  $\tau_{00}$  = variance in intercept by participant. *Note.* Participants excluded for timing of their A1C measurements included anyone whose baseline assessment took place over 100 days before study start (participant 19) or whose post-study A1C measure was taken less than 60 days after study start (participants 3, 17, 28). Participant 5 was also excluded for having only 42 days between their baseline and post-study measures.
